# Supplementary material for: Matrix Metalloproteinases and Tissue Inhibitors of Metalloproteinases in Echinoderms: Structure and Possible Functions
Source: MDPI journal article supplement (doi:10.3390/cells10092331), 2021-09-06
Supplement: s1 [file s1]

***Anneissia japonica* (PRJNA615663)**

An.jap. \_hatching enzyme\_ - XM\_033258775.1  
An.jap. \_MMP1-1\_ - XM\_033246259.1  
An.jap. \_MMP2\_ - XM\_033270892.1  
An.jap. \_MMP2-2\_ - XM\_033270859.1  
An.jap. \_MMP2-3\_ - XM\_033252596.1  
An.jap. \_MMP2-4\_ - XM\_033270828.1  
An.jap. \_MMP3\_ - XM\_033268939.1  
An.jap. \_MMP7\_ - XM\_033239646.1  
An.jap. \_MMP8\_ - XM\_033267661.1  
An.jap. \_MMP11\_ - XM\_033270068.1  
An.jap. \_MMP13\_ - XM\_033239630.1  
An.jap. \_MMP14\_ - XM\_033271712.1  
An.jap. \_MMP15\_ - XM\_033252512.1  
An.jap. \_MMP15-2\_ - XM\_033270829.1  
An.jap. \_MMP16-1\_ - XM\_033252624.1  
An.jap. \_MMP16-2\_ - XM\_033270854.1  
An.jap. \_MMP17\_ - XM\_033246263.1  
An.jap. \_MMP18\_ - XM\_033252622.1  
An.jap. \_MMP18-2\_ - XM\_033252621.1  
An.jap. \_MMP18-3\_ - XM\_033239647.1  
An.jap. \_MMP21\_ - XM\_033250918.1  
An.jap. \_MMP24\_ - XM\_033252607.1

An.jap\_TIMP2\_ - XP\_033106593.1  
An.jap\_TIMP2-2\_ - XP\_033106529.1  
An.jap\_TIMP3\_ - XP\_033106552.1  
An.jap\_TIMP3-2\_ - XP\_033106571.1  
An.jap\_TIMP3-3\_ - XP\_033106568.1  
An.jap\_TIMP3-4\_ - XP\_033106476.1  
An.jap\_TIMP3-5\_ - XP\_033126188.1

***Patiria miniata* (PRJNA683060)**

P.min. \_hatching enzyme\_ - XM\_038190972.1  
P.min. \_hatching enzyme-2\_ - XM\_038204489.1  
P.min. \_MMP2\_ - XM\_038203824.1  
P.min. \_MMP2-2\_ - XM\_038198954.1  
P.min. \_MMP7\_ - XM\_038200528.1  
P.min. \_MMP9\_ - XM\_038209867.1  
P.min. \_MMP13\_ - XM\_038219104.1  
P.min. \_MMP14\_ - XM\_038210303.1  
P.min. \_MMP14-1\_ - XM\_038200576.1  
P.min. \_MMP14-2\_ - XM\_038200551.1  
P.min. \_MMP14-3\_ - XM\_038191009.1  
P.min. \_MMP16\_ - XM\_038200539.1  
P.min. \_MMP16-2\_ - XM\_038210989.1  
P.min. \_MMP16-3\_ - XM\_038204118.1

P.min.\_MMP17\_ - XM\_038200564.1  
P.min.\_MMP18\_ - XM\_038209880.1  
P.min.\_MMP18-2\_ - XM\_038199580.1  
P.min.\_MMP19\_ - XM\_038204488.1  
P.min.\_MMP24\_ - XM\_038210053.1  
P.min.\_MMP24-2\_ - XM\_038209763.1

P.min\_TIMPa\_ - XP\_038060798.1  
P.min\_TIMPb\_ - XP\_038060798.1  
P.min\_TIMPc\_ - XP\_038060882.1  
P.min\_TIMPd\_ - XP\_038060881.1  
P.min\_TIMPe\_ - XP\_038049368.1  
P.min\_TIMP3\_ - XP\_038060714.1  
P.min\_TIMP3-2\_ - XP\_038060714.1  
P.min\_TIMP3-3\_ - XP\_038060669.1  
P.min\_TIMP3-4\_ - XP\_038062057.1  
P.min\_TIMP4\_ - XP\_038061469.1

***Strongylocentrotus purpuratus (PRJNA13728)***

S.pur.\_hatching enzyme\_ - XM\_001176086.4  
S.pur.\_MMP1\_ - XM\_003726184.3  
S.pur.\_MMP1-2\_ - XM\_030985841.1  
S.pur.\_MMP2\_ - XM\_030984783.1  
S.pur.\_MMP2-2\_ - XM\_030980005.1  
S.pur.\_MMP2-3\_ - XM\_785589.5  
S.pur.\_MMP2-4\_ - XM\_030980843.1  
S.pur.\_MMP7\_ - XM\_030980004.1  
S.pur.\_MMP9\_ - XM\_003728326.2  
S.pur.\_MMP11\_ - XM\_031000493.1  
S.pur.\_MMP11-2\_ - XM\_030972234.1  
S.pur.\_MMP12\_ - XM\_786507.5  
S.pur.\_MMP12-2\_ - XM\_786523.5  
S.pur.\_MMP13\_ - XM\_030984127.1  
S.pur.\_MMP14\_ - XM\_030980002.1  
S.pur.\_MMP16\_ - NM\_001033648.1  
S.pur.\_MMP16-2\_ - XM\_781452.5  
S.pur.\_MMP17\_ - XM\_030979866.1  
S.pur.\_MMP18\_ - XM\_783693.4  
S.pur.\_MMP21\_ - XM\_003729663.3  
S.pur.\_MMP24\_ - XM\_003725508.3  
S.pur.\_MMP24-2\_ - XM\_030992226.1

S.pur\_TIMPa\_ - XP\_030828995.1  
S.pur\_TIMPb\_ - XP\_003728985.1  
S.pur\_TIMP1\_ - XP\_003725524.1  
S.pur\_TIMP1-2\_ - XP\_001198302.2  
S.pur\_TIMP1-3\_ - XP\_030829173.1

S.pur\_TIMP2\_ - XP\_003725525.2  
S.pur\_TIMP2-2\_ - XP\_030828942.1  
S.pur\_TIMP3\_ - XP\_011673577.1  
S.pur\_TIMP3-2\_ - XP\_030828686.1  
S.pur\_TIMP3-3\_ - XP\_003725523.1

***Apostichopus japonicus* (PRJNA354676)**

Ap.jap.\_MMP1\_ - KR872413.1  
Ap.jap.\_MMP2-1\_ - MH348178.1  
Ap.jap.\_MMP2-2\_ - MRZV01000410.1  
Ap.jap.\_MMP2-3\_ - MRZV01000538.1  
Ap.jap.\_MMP2-4\_ - KX372219.1  
Ap.jap.\_MMP12\_ - MRZV01000538.1  
Ap.jap.\_MMP14\_ - PIK52473.1  
Ap.jap.\_MMP14-2\_ - MRZV01000664.1  
Ap.jap.\_MMP14-3\_ - PIK37483.1  
Ap.jap.\_MMP16\_ - MG009443.1  
Ap.jap.\_MMP16-2\_ - MRZV01000419.1  
Ap.jap.\_MMP16-3\_ - KX372220.1  
Ap.jap.\_MMP16-4\_ - MRZV01001258.1  
Ap.jap.\_MMP19\_ - MRZV01000751.1  
Ap.jap.\_MMP21\_ - MRZV01001523.1  
Ap.jap.\_MMP24\_ - MRZV01001258.1  
Ap.jap.\_hypothetical protein BSL780-00943\_ - MRZV01000018.1  
Ap.jap.\_hypothetical protein BSL78-16904\_ - MRZV01000658.1

Ap.jap\_TIMPa\_ - PIK53955.1  
Ap.jap\_TIMPb\_ - ALL53534.1  
Ap.jap\_TIMPc\_ - PIK35025.1  
Ap.jap\_TIMPd\_ - PIK51337.1  
Ap.jap\_TIMP1\_ - PIK53592.1  
Ap.jap\_TIMP1-2\_ - PIK53588.1  
Ap.jap\_TIMP1-3\_ - PIK53589.1  
Ap.jap\_TIMP1-4\_ - AVQ67918.1  
Ap.jap\_TIMP1-5\_ - PIK35024.1  
Ap.jap\_TIMP3\_ - PIK53586.1  
Ap.jap\_tensilin\_ - PIK53591.1  
Ap.jap\_tensilin2\_ - PIK52999.1

***Saccoglossus kowalevskii* (PRJNA42857)**

S.kow.\_MMP14\_ - XM\_002740999.2  
S.kow.\_MMP14-2\_ - XM\_006824319.1  
S.kow.\_MMP14-3\_ - XM\_006825494.1  
S.kow.\_MMP19\_ - XM\_002730707.2  
S.kow.\_MMP19-2\_ - XM\_002738541.2  
S.kow.\_MMP19-3\_ - NM\_001184851.1  
S.kow.\_MMP19-4\_ - XM\_006812184.1

S.kow. \_MMP19-5\_ - XM\_002731281.2  
S.kow. \_MMP21\_ - XM\_006815506.1  
S.kow. \_MMP24\_ - XM\_002738540.2

***Danio rerio* (PRJNA13922)**

D.rer. \_MMP2\_ - NM\_198067.1  
D.rer. \_MMP9\_ - NM\_213123.1  
D.rer. \_MMP11a\_ - XM\_021478463.1  
D.rer. \_MMP11b\_ - XM\_689061.9  
D.rer. \_MMP13a\_ - XM\_009305556.3  
D.rer. \_MMP13b\_ - XM\_001345471.7  
D.rer. \_MMP14a\_ - NM\_194416.1  
D.rer. \_MMP14b\_ - XM\_005171310.4  
D.rer. \_MMP15a\_ - XM\_001924007.7  
D.rer. \_MMP15b\_ - XM\_021467433.1  
D.rer. \_MMP16b\_ - XM\_695689.9  
D.rer. \_MMP17a\_ - XM\_693509.9  
D.rer. \_MMP17b\_ - NM\_001365502.1  
D.rer. \_MMP18\_ - XM\_021479446.1  
D.rer. \_MMP19\_ - XM\_021479982.1  
D.rer. \_MMP20a\_ - XM\_017351189.2  
D.rer. \_MMP20b\_ - XM\_009291754.3  
D.rer. \_MMP21\_ - NM\_001317753.1  
D.rer. \_MMP23ba\_ - XM\_021478518.1  
D.rer. \_MMP23bb\_ - NM\_001017890.1  
D.rer. \_MMP24\_ - XM\_694711.7  
D.rer. \_MMP25a\_ - XM\_021471453.1  
D.rer. \_MMP25b\_ - XM\_002663896.5  
D.rer. \_MMP28\_ - XM\_001337545.7  
D.rer. \_MMP30\_ - NM\_001040291.1

D.rer\_TIMP2\_ - XP\_005172816.1  
D.rer\_TIMP2a\_ - NP\_878294.1  
D.rer\_TIMP2b\_ - NP\_998461.1  
D.rer\_TIMP3\_ - XP\_005174719.3  
D.rer\_TIMP4.2\_ - NP\_001315189.1  
D.rer\_TIMP4.3\_ - NP\_001313362.1

***Xenopus laevis* (PRJNA338693)**

X.lae. \_MMP1S\_ - NM\_001094954.1  
X.lae. \_MMP2S\_ - NM\_001087228.2  
X.lae. \_MMP3\_ - XM\_018247760.1  
X.lae. \_MMP3-1\_ - XM\_018250308.1  
X.lae. \_MMP3L\_ - NM\_001093594.1  
X.lae. \_MMP7\_ - NM\_001086393.1  
X.lae. \_MMP7L\_ - NM\_001086213.1  
X.lae. \_MMP8L\_ - NM\_001087049.2

X.lae. \_MMP8S\_ - NM\_001095034.2  
X.lae. \_MMP9\_ - XM\_018238374.1  
X.lae. \_MMP9-2L\_ - NM\_001097836.1  
X.lae. \_MMP9S\_ - NM\_001086503.1  
X.lae. \_MMP11L\_ - XM\_018262938.1  
X.lae. \_MMP13S\_ - NM\_001086405.1  
X.lae. \_MMP14\_ - XM\_018243932.1  
X.lae. \_MMP15\_ - XM\_018260625.1  
X.lae. \_MMP16\_ - XM\_018223848.1  
X.lae. \_MMP17\_ - XM\_018244170.1  
X.lae. \_MMP17-2\_ - XM\_018236930.1  
X.lae. \_MMP18\_ - XM\_018247758.1  
X.lae. \_MMP18-2\_ - XM\_018245742.1  
X.lae. \_MMP18-3\_ - XM\_018247759.1  
X.lae. \_MMP18-4\_ - XM\_018248750.1  
X.lae. \_MMP18-5\_ - XM\_018245743.1  
X.lae. \_MMP18-6\_ - XM\_018245744.1  
X.lae. \_MMP18-7\_ - XM\_018248751.1  
X.lae. \_MMP18-8\_ - XM\_018231261.1  
X.lae. \_MMP20L\_ - NM\_001097975.1  
X.lae. \_MMP21\_ - XM\_018254889.1  
X.lae. \_MMP21-2\_ - XM\_018241577.1  
X.lae. \_MMP21L\_ - NM\_001085816.1  
X.lae. \_MMP28L\_ - NM\_001172229.2  
X.lae. \_MMP28S\_ - NM\_001090135.1

X.lae\_TIMP1\_ - XP\_018087965.1  
X.lae\_TIMP2\_ - XP\_018093841.1  
X.lae\_TIMP3\_ - NP\_001079064.1  
X.lae\_TIMP4\_ - XP\_018095919.1

***Homo sapiens (PRJNA168)***

H.sap. \_MMP1\_ - BT020147.1  
H.sap. \_MMP2\_ - NM\_001127891.3  
H.sap. \_MMP3\_ - NM\_002422.4  
H.sap. \_MMP7\_ - NM\_002423.4  
H.sap. \_MMP8\_ - NM\_001304441.1  
H.sap. \_MMP9\_ - NM\_004994.2  
H.sap. \_MMP10\_ - NM\_002425.2  
H.sap. \_MMP12\_ - NM\_002426.5  
H.sap. \_MMP13\_ - NM\_002427.3  
H.sap. \_MMP14\_ - NM\_004995.3  
H.sap. \_MMP15\_ - NM\_002428.3  
H.sap. \_MMP16\_ - NM\_005941.4  
H.sap. \_MMP17\_ - NM\_016155.6  
H.sap. \_MMP18\_ - Y08622.1  
H.sap. \_MMP20\_ - NM\_004771.3

H.sap. \_MMP21\_ - AF520613.1  
H.sap. \_MMP23\_ - AJ005256.1  
H.sap. \_MMP24\_ - NM\_006690.3  
H.sap. \_MMP25\_ - NM\_022468.4  
H.sap. \_MMP26\_ - NM\_021801.4  
H.sap. \_MMP27\_ - NM\_022122.2  
H.sap. \_MMP28\_ - BC002631.2

H.sap\_TIMP1\_ - NP\_003245.1  
H.sap\_TIMP2\_ - NP\_003246.1  
H.sap\_TIMP3\_ - NP\_000353.1  
H.sap\_TIMP4\_ - NP\_003247.1

***Drosophila melanogaster* (PRJNA164)**

D.mel. \_MMP1\_ - NM\_001259570.2  
D.mel\_TIMP\_ - NP\_731461.1
